# Supplementary material for: Impact of Prolonged Sitting Interruption on Blood Glucose, Insulin and Triacylglycerol in Adults: A Systematic Review and Meta-Analysis
Source: MDPI journal article supplement (doi:10.3390/app14083201), 2024-04-10
Supplement: s1 [file s1]

# Impact of Prolonged Sitting interruption on Blood Glucose, Insulin and Triacylglycerol in Adults: A Systematic Review and Meta-analysis

## Supplementary File S1

### Contents

|                                                                                                                    |    |
|--------------------------------------------------------------------------------------------------------------------|----|
| Table S1 Search strategy.....                                                                                      | 2  |
| Figure S1 Network plots for comparisons of different interventions on glucose, insulin, and triacylglycerol. ....  | 3  |
| Figure S2 Forest plots of network meta-analyses for glucose and insulin compared with prolonged sitting. ....      | 5  |
| Figure S3 Local inconsistency test results for glucose, insulin and triacylglycerol responses.....                 | 8  |
| Table S2 The ranking of interventions for glucose and insulin in the network meta-analysis.....                    | 9  |
| Figure S4 Funnel plots for each outcome in the network meta-analysis for glucose, insulin and triacylglycerol..... | 10 |
| Table S3 The risk of bias assessment of included studies.....                                                      | 13 |

**Table S1 Search strategy**

| Database         | Search strategy                                                                                                                                                                                                                                                                                                                                                 | Results                 |
|------------------|-----------------------------------------------------------------------------------------------------------------------------------------------------------------------------------------------------------------------------------------------------------------------------------------------------------------------------------------------------------------|-------------------------|
| PubMed           | ((sitting[Title/Abstract] OR seden*[Title/Abstract])) AND ((exercise[Title/Abstract] OR “physical activity”[Title/Abstract])) AND ((glucose[Title/Abstract] OR insulin[Title/Abstract] OR glycemi*[Title/Abstract] OR metabolic*[Title/Abstract] OR triglyceride[Title/Abstract] OR triacylglycerol[Title/Abstract])) Restricted to Randomized Controlled Trail | 677                     |
| Web of Science   | #1 ABSTRACT: (exercise OR “physical activity”)<br>#2 ABSTRACT: (sitting OR seden*)<br>#3 ABSTRACT: (randomiz* OR break* OR interrupt*)<br>#4 ABSTRACT: (glucose OR insulin OR glycemi* OR metabolic* OR triglyceride OR triacylglycerol)<br>#5 #4 AND #3 AND #2 AND #1<br>Restricted to Clinical Trail                                                          | 436                     |
| Scopus           | ( TITLE-ABS-KEY ( ( sitting OR seden* ) ) AND TITLE-ABS-KEY ( ( exercise OR “physical activity” ) ) AND TITLE-ABS-KEY ( randomiz* ) AND TITLE-ABS-KEY ( ( glucose OR insulin OR glycemi* OR metabolic* OR triglyceride OR triacylglycerol ) ) ) AND PUBYEAR < 2023 AND ( LIMIT-TO ( LANGUAGE , "English" ) )                                                    | 959                     |
| Cochrane Library | (sitting OR seden*) AND (exercise OR “physical activity”) AND (randomiz*) AND (glucose OR insulin OR glycemi* OR metabolic* OR triglyceride* OR triacylglycerol) in Title Abstract Keyword - with Publication Year to 2022, in Trials                                                                                                                           | Embase 826<br>CINAHL 32 |

Figure S1 Network plots for comparisons of different interventions on glucose, insulin, and triacylglycerol.

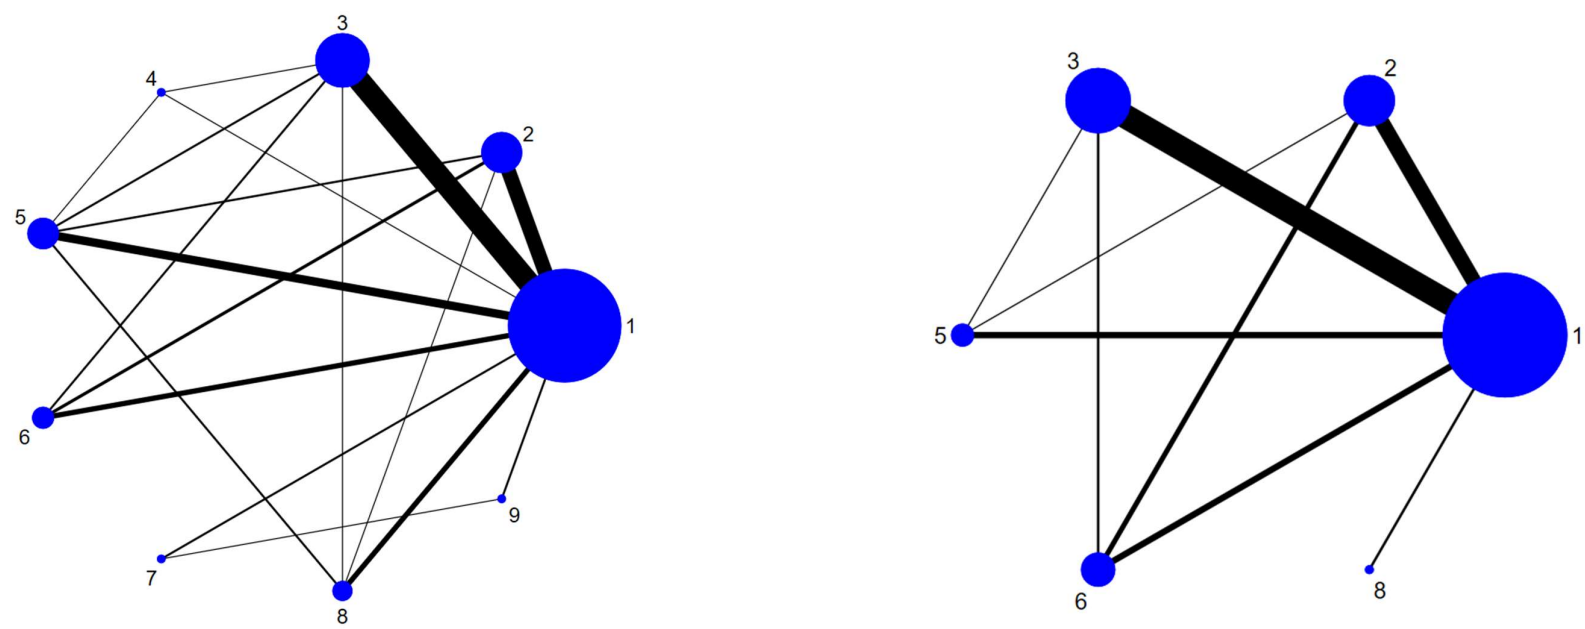

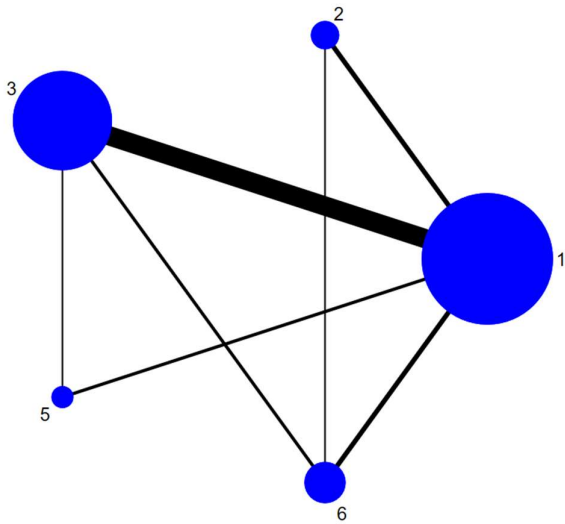

Network plots for comparisons of outcomes. Comparisons of different interrupting prolonged sitting interventions on glucose (upper left portion), insulin (upper right portion), and triacylglycerol (lower left portion).

- 1) Prolonged sitting
- 2) Every 20-min interruption
- 3) Every 30-min interruption
- 4) Every 45-min interruption
- 5) Every 60-min interruption
- 6) A single 30-min exercise bout
- 7) A single 45-min exercise bout
- 8) A single 60-min exercise bout
- 9) Three 15-min bouts after meals

Figure S2 Forest plots of network meta-analyses for glucose, insulin and triacylglycerol.

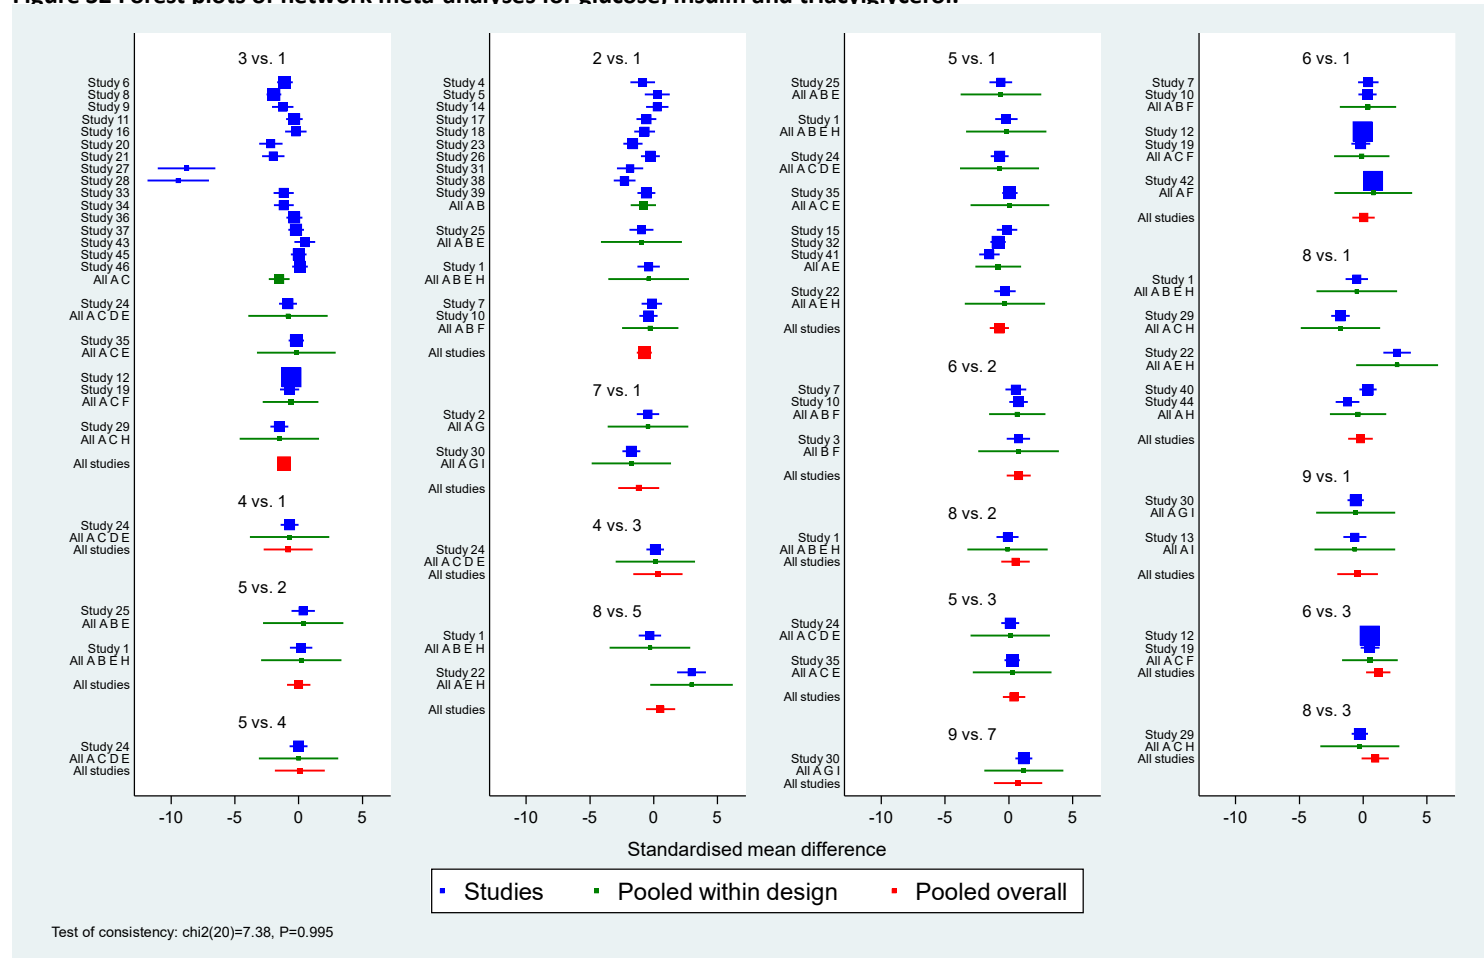

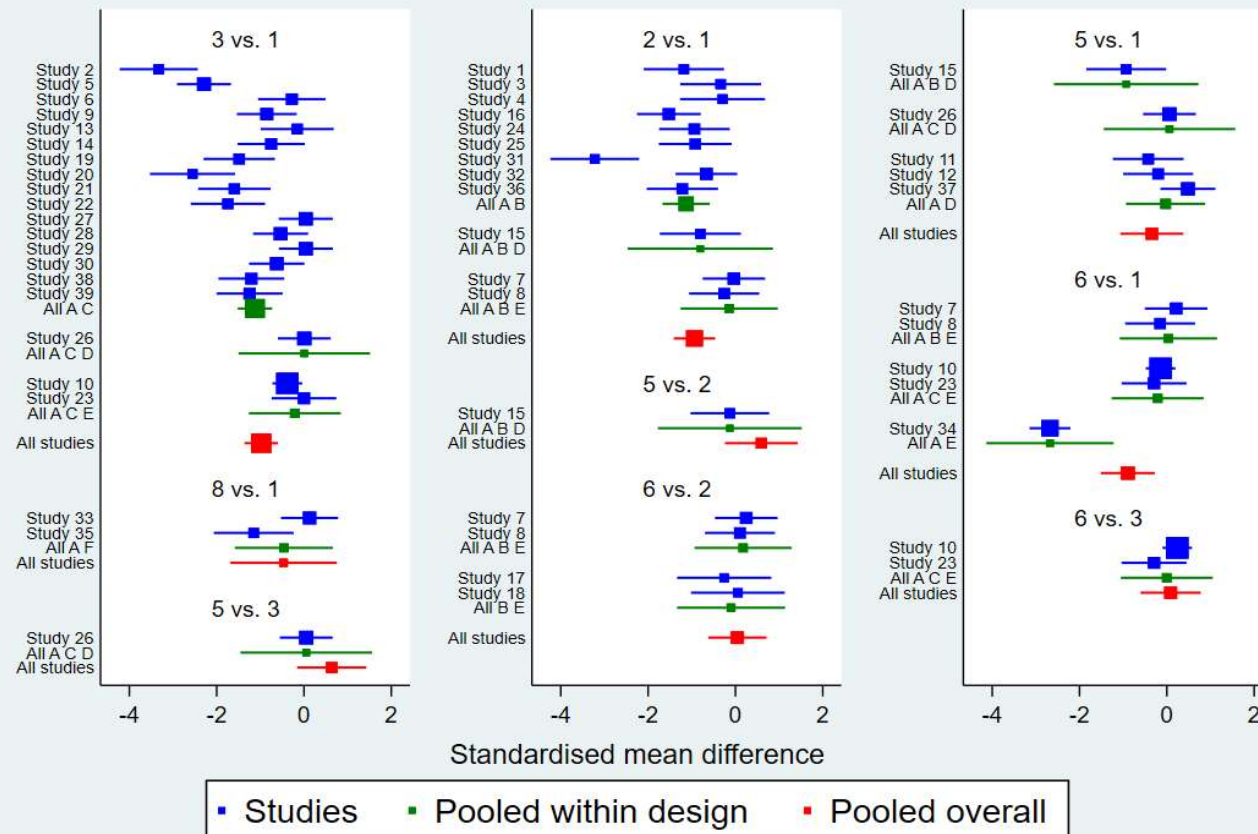

Test of consistency:  $\chi^2(9)=15.34$ ,  $P=0.082$

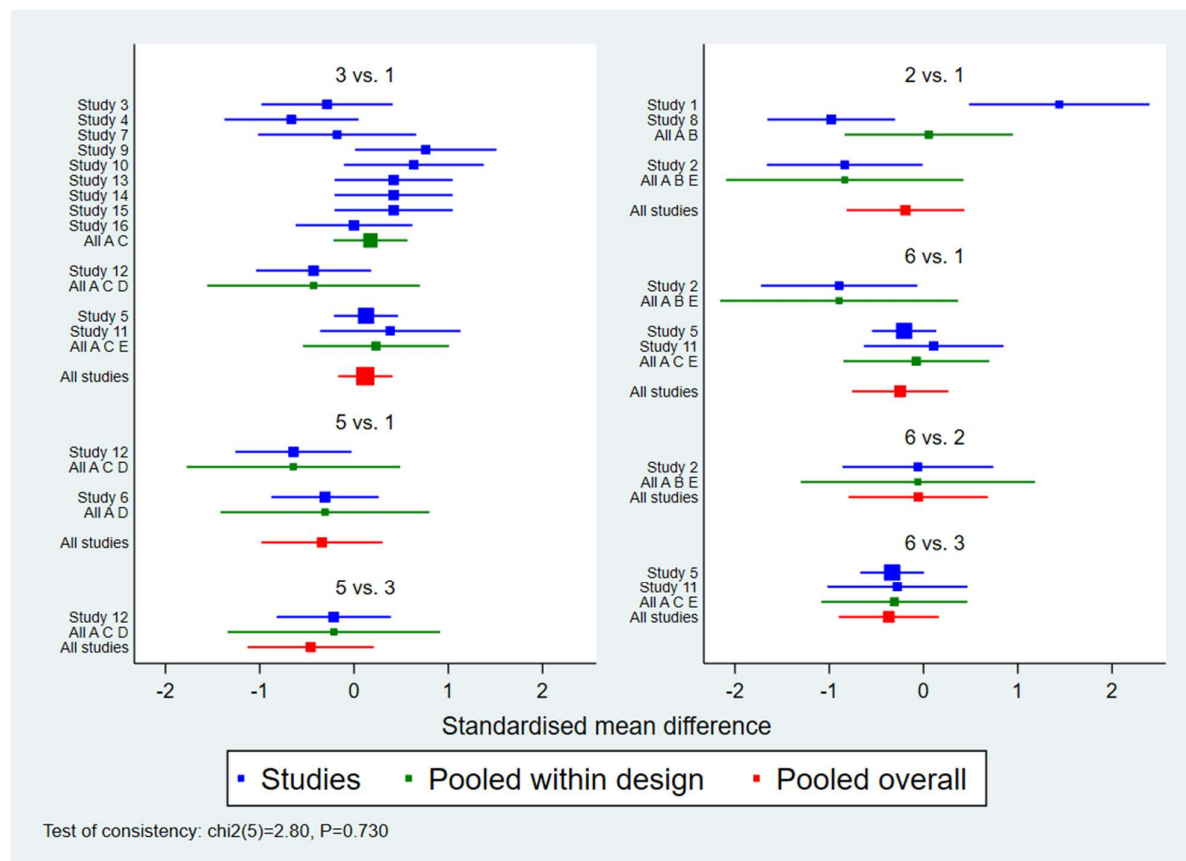

Forest plots of network meta-analyses for glucose (first), insulin (second) and triacylglycerol (third) compared with prolonged sitting. A = (reference), prolonged sitting; B = Every 20-min interruption; C = Every 30-min interruption; D = Every 45-min interruption; E = Every 60-min interruption; F = a single 30-min exercise bout; G = a

single 45-min exercise bout; H = a single 60-min exercise bout; I = three 15-min bouts after meals.

**Figure S3 Local inconsistency test results for glucose, insulin and triacylglycerol responses.**

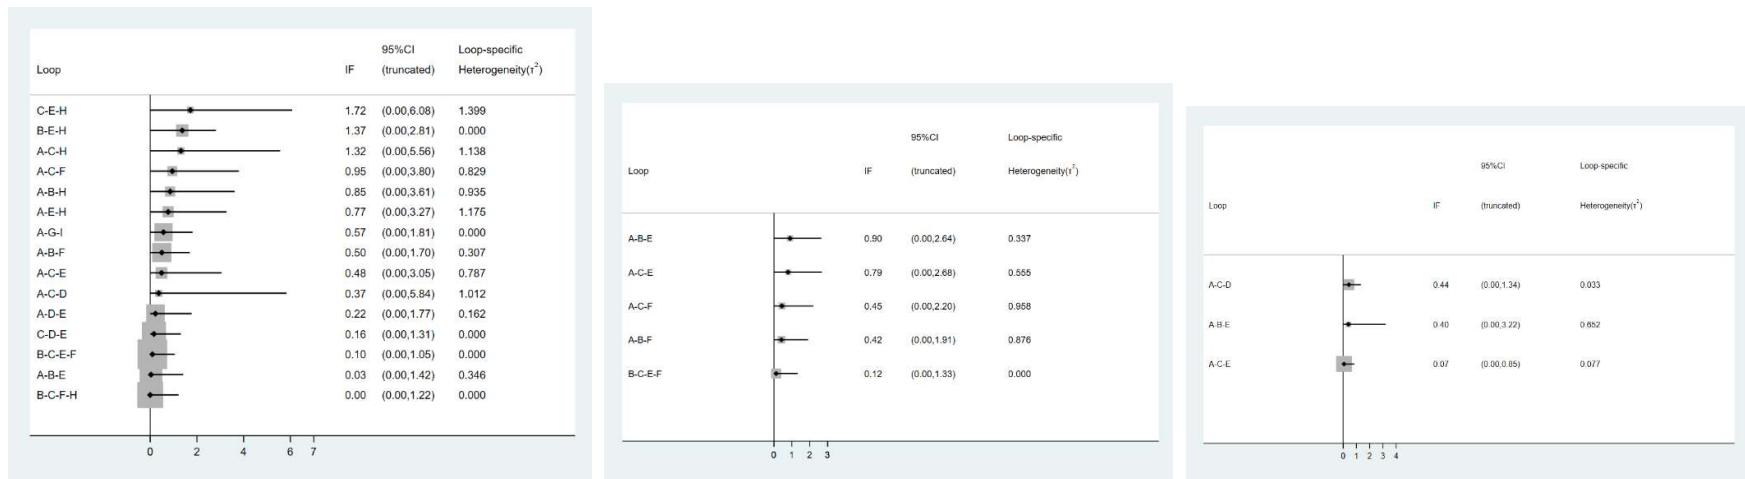

Local inconsistency test results for glucose (left), insulin (middle) and Triacylglycerol (right) responses. A = (reference), prolonged sitting; B = Every 20-min interruption; C = Every 30-min interruption; D = Every 45-min interruption; E = Every 60-min interruption; F = a single 30-min exercise bout; G = a single 45-min exercise bout; H = a single 60-min exercise bout; I = three 15-min bouts after meals.



**Table S2 The ranking of interventions for glucose and insulin in the network meta-analysis.**

| <b>Glucose</b>                 |                   | <b>Insulin</b>                |                   |
|--------------------------------|-------------------|-------------------------------|-------------------|
| <b>Treatment</b>               | <b>SUCRA (%)*</b> | <b>Treatment</b>              | <b>SUCRA (%)*</b> |
| Prolonged sitting              | 18.3              | Prolonged sitting             | 8.2               |
| Every 20-min interruption      | 60.5              | Every 20-min interruption     | 73.7              |
| Every 30-min interruption      | 81.8              | Every 30-min interruption     | 77.5              |
| Every 45-min interruption      | 59.0              |                               |                   |
| Every 60-min interruption      | 59.6              | Every 60-min interruption     | 41.6              |
| A single 30-min exercise bout  | 20.2              | A single 30-min exercise bout | 68.8              |
| A single 45-min exercise bout  | 74.3              |                               |                   |
| A single 60-min exercise bout  | 31.9              | A single 60-min exercise bout | 30.2              |
| Three 15-min bouts after meals | 44.5              |                               |                   |

Figure S4 Funnel plots for each outcome in the network meta-analysis for glucose, insulin and triacylglycerol.

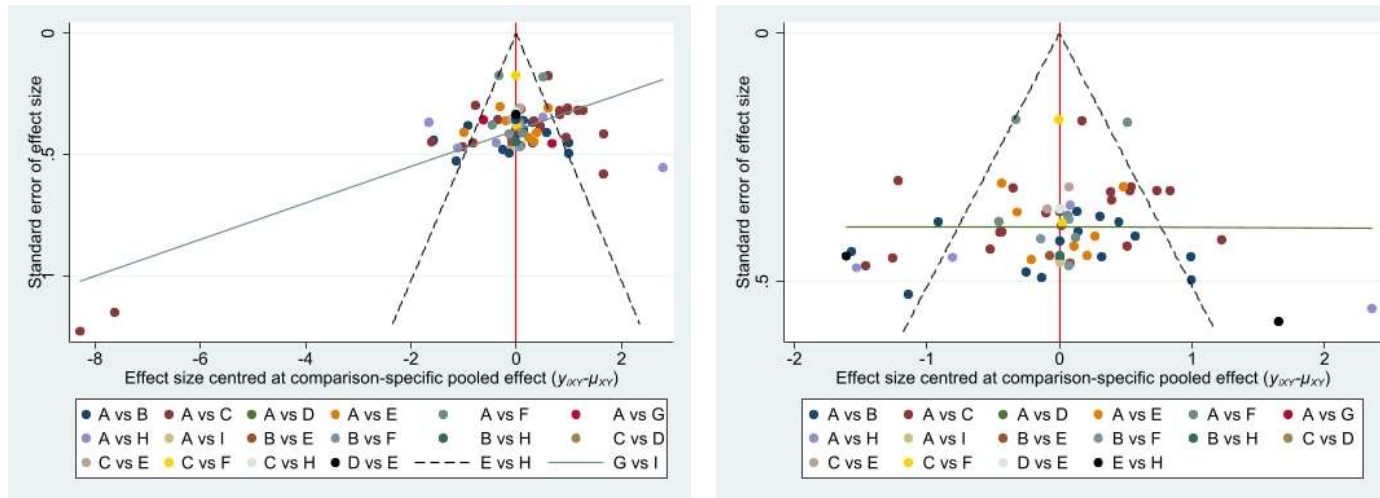

Funnel plots for each outcome in the network meta-analysis for glucose in the sample as a whole (left) and excluding the sample with type 2 diabetes (right). A = (reference), prolonged sitting; B = Every 20-min interruption; C = Every 30-min interruption; D = Every 45-min interruption; E = Every 60-min interruption; F = a single 30-min exercise bout; G = a single 45-min exercise bout; H = a single 60-min exercise bout; I = three 15-min bouts after meals.

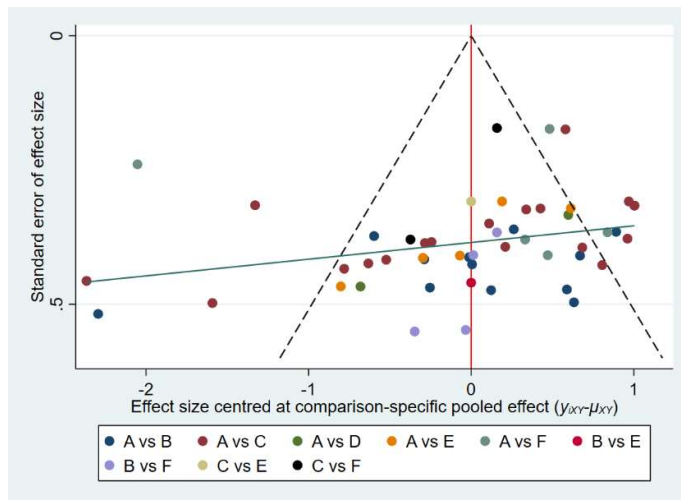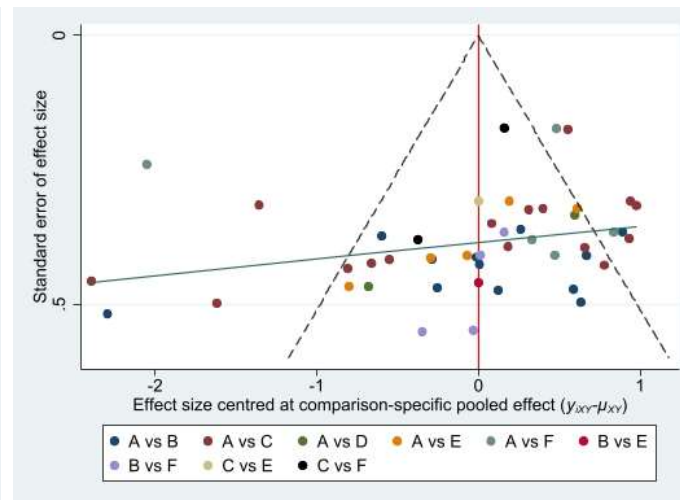

Funnel plots for each outcome in the network meta-analysis for insulin in the sample as a whole (left) and excluding the sample with type 2 diabetes (right). A = (reference), prolonged sitting; B = Every 20-min interruption; C = Every 30-min interruption; D = Every 60-min interruption; E = a single 30-min exercise bout; F = a single 60-min exercise bout.

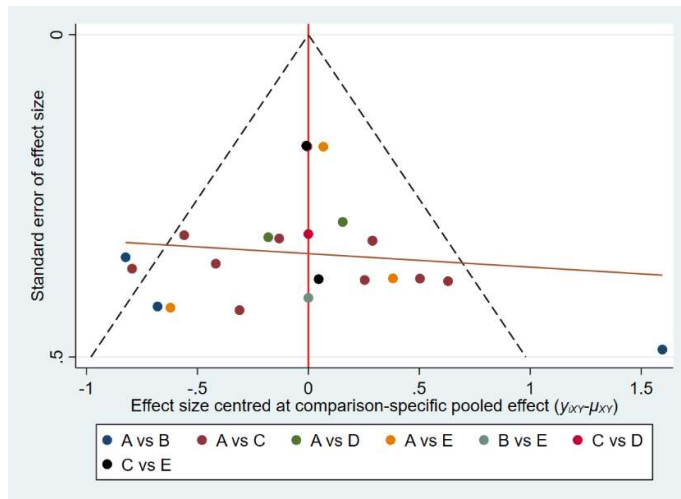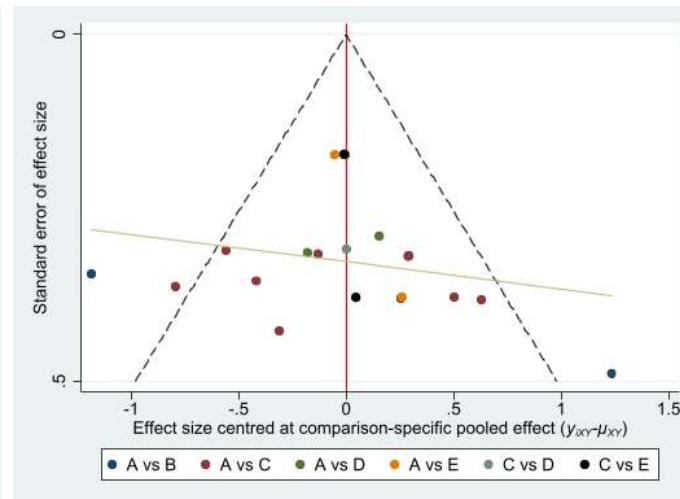

Funnel plots for each outcome in the network meta-analysis for triacylglycerol in the sample as a whole (left) and excluding the sample with hypertriglyceridemia (right). A = (reference), prolonged sitting; B = Every 20-min interruption; C = Every 30-min interruption; D = Every 60-min interruption; E = a single 30-min exercise bout.

**TableS3 The risk of bias assessment of included studies.**

| Sources                | Random sequence generation | Allocation concealment | Blinding of participants and personnel | Blinding of outcome assessment | Incomplete outcome data | Selective reporting | Other bias |
|------------------------|----------------------------|------------------------|----------------------------------------|--------------------------------|-------------------------|---------------------|------------|
| Altenburg et al 2019   | Low                        | High                   | High                                   | Unclear                        | Low                     | Low                 | Unclear    |
| Bailey et al 2015      | Unclear                    | Unclear                | High                                   | Unclear                        | Low                     | Unclear             | Unclear    |
| Bailey et al 2016      | Unclear                    | Unclear                | High                                   | Unclear                        | Low                     | Unclear             | Unclear    |
| Bailey et al 2022      | Low                        | Low                    | High                                   | High                           | Low                     | Low                 | Low        |
| Benatti et al 2017     | Low                        | Unclear                | High                                   | Unclear                        | Low                     | Low                 | Unclear    |
| Bhammar et al 2017     | Unclear                    | Unclear                | High                                   | Unclear                        | Low                     | Unclear             | Unclear    |
| Blakenship et al. 2014 | Unclear                    | Unclear                | High                                   | High                           | Low                     | Low                 | Low        |
| Champion et al. 2018   | Low                        | Unclear                | High                                   | Unclear                        | Unclear                 | Unclear             | Unclear    |
| Charlett et al. 2021   | Low                        | Low                    | High                                   | High                           | Low                     | Unclear             | Unclear    |
| Chen et al. 2018       | Unclear                    | Unclear                | High                                   | High                           | Low                     | Low                 | Low        |
| Christmas et al. 2019  | Low                        | Unclear                | High                                   | Unclear                        | Low                     | Unclear             | Unclear    |
| Dempsey et al. 2016    | Low                        | Low                    | High                                   | Low                            | Low                     | Low                 | Low        |
| Di Pietro et al. 2013  | Unclear                    | Unclear                | High                                   | High                           | Low                     | Low                 | Low        |
| Dunstan et al. 2012    | Low                        | Low                    | High                                   | Low                            | Low                     | Low                 | Unclear    |
| Duvivier et al. 2013   | Unclear                    | Unclear                | High                                   | Unclear                        | Unclear                 | Low                 | Unclear    |
| Duvivier et al. 2017br | Low                        | Low                    | High                                   | Low                            | Low                     | Low                 | Low        |
| Duvivier et al. 2017be | Low                        | Low                    | High                                   | Low                            | Low                     | Low                 | Low        |
| Hansen et al. 2016     | Unclear                    | Unclear                | High                                   | Unclear                        | Low                     | Unclear             | Unclear    |
| Hawari et al. 2019     | unclear                    | Low                    | High                                   | Unclear                        | Low                     | Unclear             | Unclear    |
| Henson et al. 2016     | Low                        | Unclear                | High                                   | Unclear                        | Low                     | Unclear             | Unclear    |

|                         |                            |                        |                                        |                                |                         |                     |            |
|-------------------------|----------------------------|------------------------|----------------------------------------|--------------------------------|-------------------------|---------------------|------------|
| Holmstrup et al. 2014   | Low                        | Unclear                | High                                   | Unclear                        | Low                     | Unclear             | Unclear    |
| Sources                 | Random sequence generation | Allocation concealment | Blinding of participants and personnel | Blinding of outcome assessment | Incomplete outcome data | Selective reporting | Other bias |
| Honda et al. 2016       | Unclear                    | Unclear                | High                                   | High                           | Low                     | Low                 | Low        |
| Kashiwabara et al. 2018 | Unclear                    | Unclear                | High                                   | High                           | Low                     | Low                 | Low        |
| Kerr et al. 2017        | Low                        | High                   | High                                   | High                           | Low                     | Low                 | Unclear    |
| Larsen et al. 2015      | Unclear                    | Unclear                | High                                   | Unclear                        | High                    | Low                 | Unclear    |
| Ma et al. 2020          | Low                        | Low                    | High                                   | Unclear                        | Low                     | Low                 | Unclear    |
| Maylor et al. 2019      | Unclear                    | Low                    | High                                   | Unclear                        | Low                     | Unclear             | Unclear    |
| McCarthy et al. 2017b   | Unclear                    | Unclear                | High                                   | High                           | Low                     | Low                 | Low        |
| McCarthy et al. 2017f   | Unclear                    | Unclear                | High                                   | High                           | Low                     | Low                 | Low        |
| Miyashita et al. 2016   | Low                        | Unclear                | High                                   | Unclear                        | Low                     | Unclear             | Unclear    |
| Newsom et al. 2013      | Unclear                    | Unclear                | High                                   | Unclear                        | Low                     | Unclear             | Unclear    |
| Peddie et al. 2013      | Low                        | Low                    | High                                   | Unclear                        | Low                     | Low                 | Unclear    |
| Peddie et al. 2021      | Low                        | Low                    | High                                   | High                           | Low                     | High                | Low        |
| Pulsford et al. 2017    | Low                        | Low                    | High                                   | Unclear                        | Low                     | Unclear             | Unclear    |
| Van Dijk et al. 2013    | Unclear                    | Unclear                | High                                   | High                           | Low                     | High                | Low        |
| Wheeler et al. 2020     | Low                        | Low                    | High                                   | High                           | Low                     | Low                 | Low        |
| Wong et al. 2021        | Low                        | Low                    | High                                   | High                           | Low                     | Low                 | Low        |
| Yates et al. 2020       | Low                        | Low                    | High                                   | Low                            | Low                     | Low                 | Unclear    |
